# Supplementary material for: Resolving thyroid lineage cell trajectories merging into a dual endocrine gland in mammals
Source: Research Square preprint supplement (doi:10.21203/rs.3.rs-5278325/v1), 2024-10-24
Supplement: Supplementary file 1 [file bc624e87e46f0dc0e63d1340.pdf]

**Supplementary Table 1.** Identity and features of differentially expressed genes in immature and differentiated cells of the ultimobranchial lineage

**A. *Calca\_pos* vs *Calca\_neg* Ubb cells**

| Gene          | Protein                              | Development                     | Endocrine                            | Function(s)                  |
|---------------|--------------------------------------|---------------------------------|--------------------------------------|------------------------------|
| <i>Nnat</i>   | Neuronatin                           | neural fate, brain              | pituitary, pancreatic beta-cells     | calcium regulation           |
| <i>Mest</i>   | Mesoderm-specific transcript homolog | mesoderm                        | adrenal                              | EMT                          |
| <i>Foxa2</i>  | Forkhead box A                       | endoderm, lung, liver, pancreas | thyroid C cells, pancreas            | pioneer transcription factor |
| <i>Btg2</i>   | B-cell translocation gene 2          | neurogenesis                    | pancreatic beta-cells                | cell cycle                   |
| <i>Cplx2</i>  | Complexin 2 (synaphin)               | -                               | neuroendocrine                       | exocytosis                   |
| <i>Ascl1</i>  | Achaete-scute homolog 1 (MASH1)      | neurogenesis                    | adrenal, thyroid C cells, MTC        | pioneer transcription factor |
| <i>Cdc25b</i> | Cdc25 isoform                        | early embryogenesis             | MTC                                  | cell cycle                   |
| <i>Socs2</i>  | Suppressor of cytokine signaling 2   | neuronal differentiation        | pancreatic beta-cells                | JAK/STAT signaling           |
| <i>Hair1</i>  | Hoxa adjacent long noncoding RNA 1   | ESC lineage differentiation     | -                                    | RA regulation                |
| <i>Sst</i>    | Somatostatin                         | neuroendocrine differentiation  | neuroendocrine, MTC                  | peptide hormone              |
| <i>Krt7</i>   | Keratin 7                            | epithelial differentiation      | neuroendocrine                       | cytoskeleton                 |
| <i>Prox1</i>  | Prospero homeobox 1                  | cell fate determination         | neuroendocrine, thyroid C cells, MTC | EMT, secretory pathway       |

**B. *Calca\_neg* vs *Calca\_pos* Ubb cells**

| Gene           | Protein                                         | Function(s)                                              |
|----------------|-------------------------------------------------|----------------------------------------------------------|
| <i>Hmcn1</i>   | Hemicentin 1 (HMCN1)                            | ECM, basement membrane organization, cell anchorage      |
| <i>Plagl1</i>  | PLAGL1 (ZAC-1)                                  | transcription factor, ECM regulation, anti-proliferative |
| <i>Hs6s2</i>   | Heparan sulfate 6 sulfotransferase 2            | ECM regulation, morphogen/growth factor activation       |
| <i>Rbm12b2</i> | RNA binding motif protein 12                    | post-transcriptional regulation                          |
| <i>Smtnl2</i>  | Smoothelin-like 2                               | apical actin turnover                                    |
| <i>Dscc1</i>   | DNA replication and sister chromatid cohesion 1 | DNA replication                                          |

List of genes in A and B relates to data presented in Supplementary figures 10a and b, respectively.

Based on scRNAseq analysis of E12.5 cells confined to Ubb clusters 4, 6 and 8

Abbr: Ubb ultimobranchial body, MTC medullary thyroid carcinoma, EMT epithelial-mesenchymal transition, ECM extracellular matrix
